# Supplementary material
Source: Springer Nature journal article supplement (https://www.springermedizin.de/resource/supplementary/13051_2011_221_MOESM4_ESM.pdf/9670194)

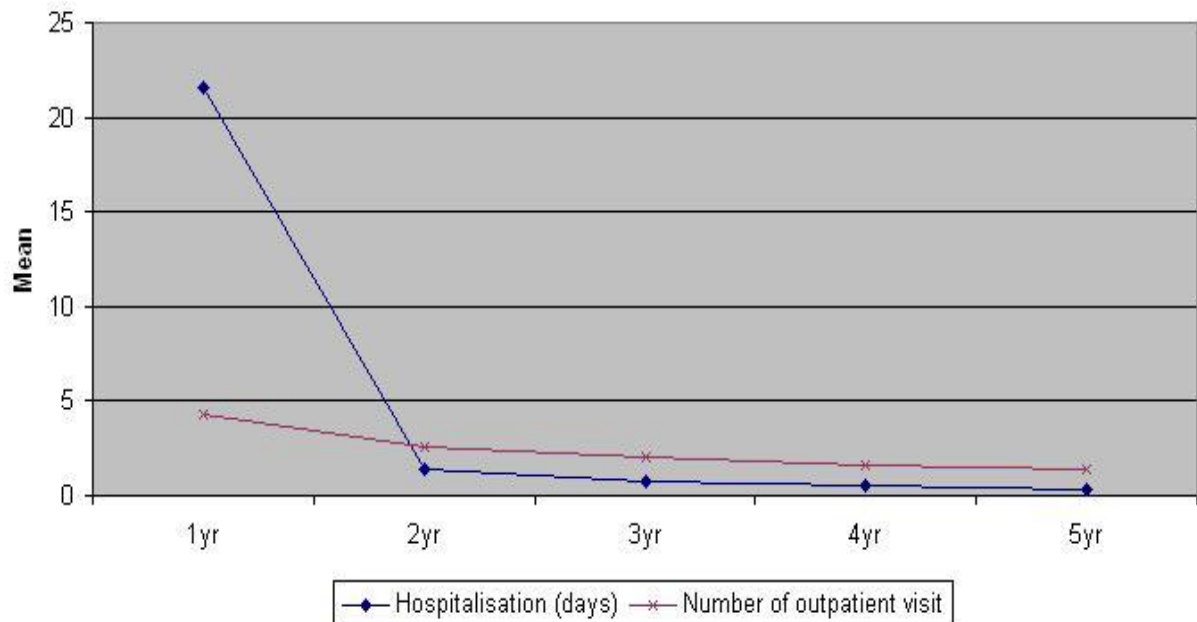

Supplement: MOESM4 [file 9670194]
